# Supplementary material for: Reduced Bacterial Colony Count of Anaerobic Bacteria Is Associated with a Worsening in Lung Clearance Index and Inflammation in Cystic Fibrosis
Source: PubMed Central journal article supplement (PMC4439045; doi:10.1371/journal.pone.0126980), 2015-05-20

**S1 Fig. Recruitment flowchart of a) CF patients and b) Control subjects**

a)

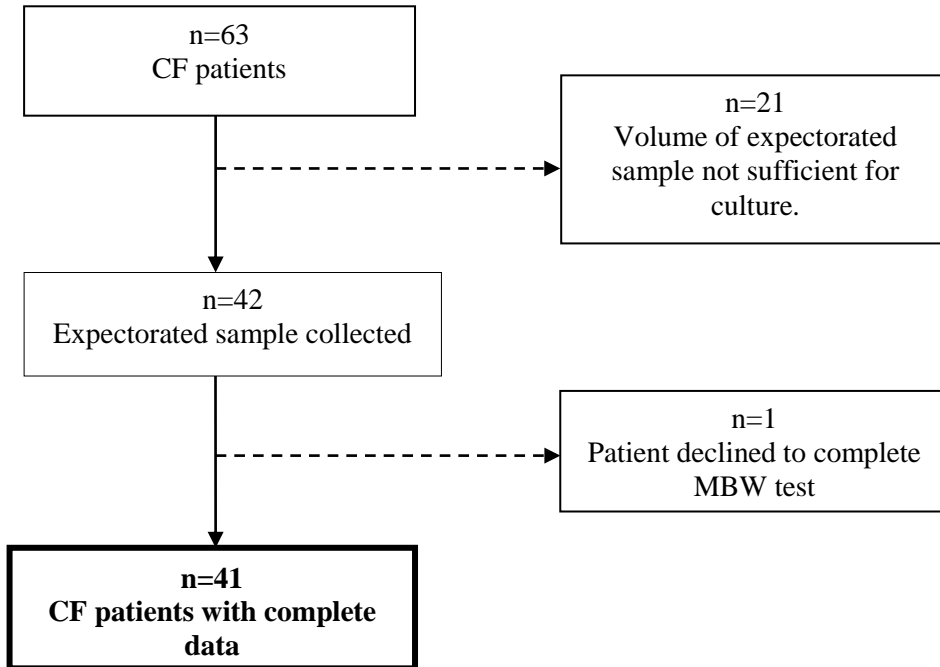

b)

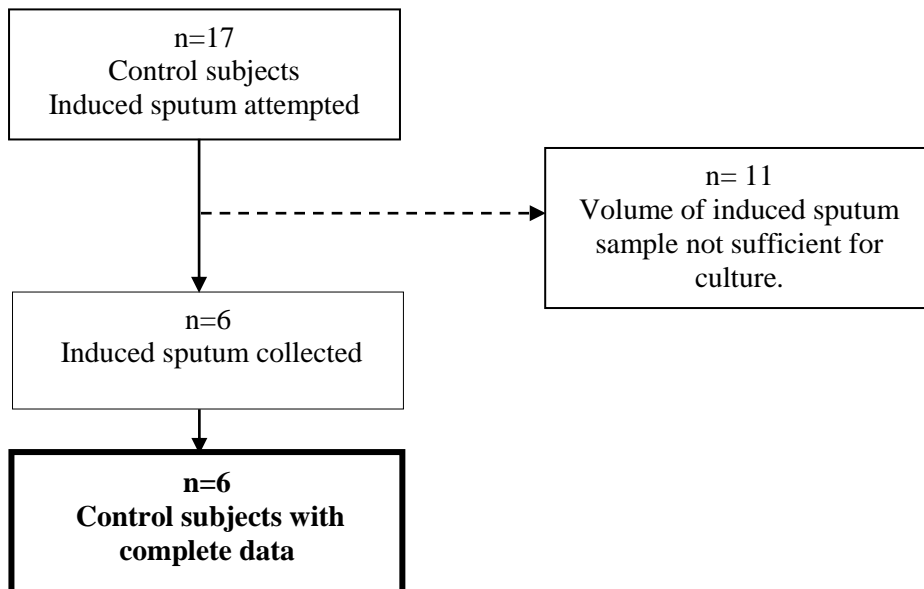

Supplement: pone.0126980.s001.pdf [file pone.0126980.s001.pdf]
