# Supplementary material for: Reduced Bacterial Colony Count of Anaerobic Bacteria Is Associated with a Worsening in Lung Clearance Index and Inflammation in Cystic Fibrosis
Source: PubMed Central journal article supplement (PMC4439045; doi:10.1371/journal.pone.0126980), 2015-05-20

**S2 Fig. Relationship between total viable count of *Veillonella* and a) LCI and b) FEV<sub>1</sub>**

**z-score.**

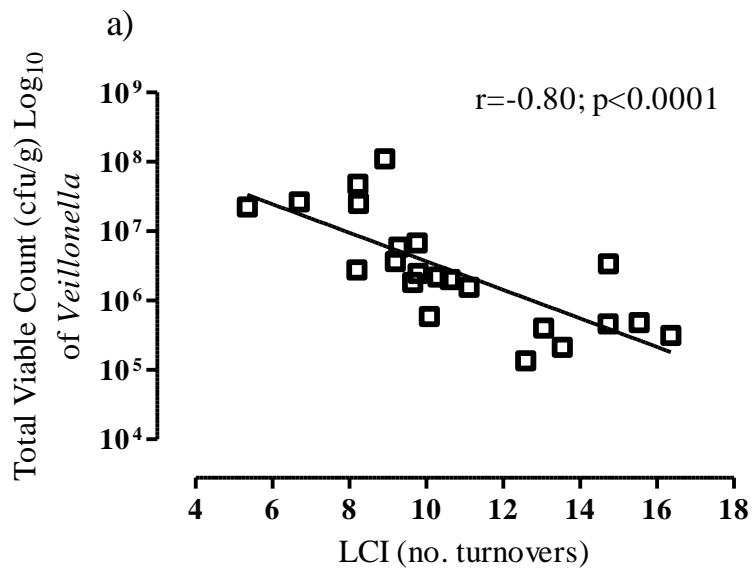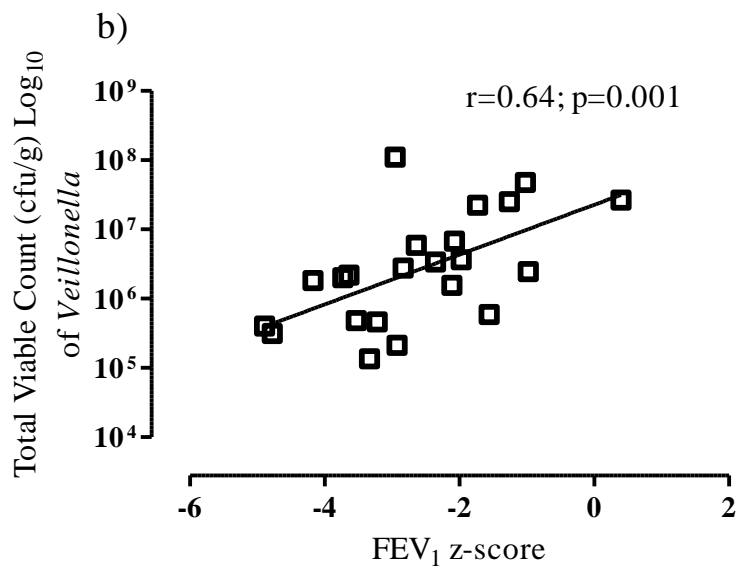

Supplement: pone.0126980.s002.pdf [file pone.0126980.s002.pdf]
